# Supplementary material
Source: PubMed Central journal article supplement (PMC5777133)
Supplement: NIHMS929469-supplement-supp_info.pdf [file NIHMS929469-supplement-supp_info.pdf]

## **Methods**

### **Xenograft animal model and experimental therapy**

22RV1 ( $2 \times 10^6$  cells/site) mixed with Matrigel (Thermo Fisher Scientific) at 1:1 (v/v) was subcutaneously injected into each flank of NOD-SCID animal. Once tumor became palpable and reached around  $75 \text{ mm}^3$ , tumor-bearing animals were randomized into treatment group (TST-D,  $300 \text{ }\mu\text{g/kg/day}$ ) or control group (DMSO) that were delivered using ALZET osmotic pumps (DURECT Corporation, Cupertino, CA) by subcutaneous implantation. Tumor volume was measured by using caliper prior-injection and every 2 days post-injection. Due to extensive tumor necrosis, experiment was terminated 4 days after treatment. Each tumor was excised and weighted then either snap frozen or fixed with formalin.

**Table S1 List of Antibodies**

| <b>Name</b>                               | <b>Clone</b> | <b>Company (CAT#)</b>      |
|-------------------------------------------|--------------|----------------------------|
| $\beta$ -actin                            |              | Sigma-Aldrich(A5441)       |
| AR                                        | N-20         | Santa Cruz (sc-816)        |
| AR-V7                                     |              | Presion Antibody (AG10008) |
| AKR1C3                                    |              | Sigma-Aldrich (A6229)      |
| SAP155                                    | 16           | MBL (D221-3)               |
| U2AF65                                    | MC3          | Santa Cruz (sc-53942)      |
| U2AF35                                    | N-16         | Santa Cruz (sc-19961)      |
| Cleaved caspase-3 <sup>Asp175</sup> (IHC) | D3E9         | Cell Signaling (9579S)     |
| Ki67                                      | B56          | BD (550609)                |

**Table S2 List of Primers**

| <b>Name</b>            | <b>Primer sequence</b>                    | <b>Location</b> |
|------------------------|-------------------------------------------|-----------------|
| AR-V7 F                | 5'-CCATCTTGTCGTCTTCGGAAATGTTATGAAGC-3'    |                 |
| AR-V7 R                | 5'-TTTGAATGAGGCAAGTCAGCCTTTCT-3'          |                 |
| AR-FL F                | 5'-ACATCAAGGAACTCGATCGTATCATTGC-3'        |                 |
| AR-FL R                | 5'-TTGGGCACTTGCACAGAGAT-3'                |                 |
| AR-V7 mini F           | 5'-CAGGGATGACTCTGGGAGAA-3'                | Exon3/3b        |
| AR-V7 mini R           | 5'-GCCCTCTAGAGCCCTCATT-3'                 | 3' UTR          |
| AR mini F              | 5'-TCTTGTCGTCTTCGGAAATGT-3'               | Exon 3          |
| AR mini R              | 5'-AAGCCTCTCCTTCCTCCTGTA-3'               | Exon 4          |
| PSA F                  | 5'-GACCAAGTTCATGCTGTGTG-3'                |                 |
| PSA R                  | 5'-ACTAGGGAGCCATGGAGGAC-3'                |                 |
| 18s rRNA F             | 5'-GGAATTGACGGAAGGGCACCACC-3'             |                 |
| 18s rRNA R             | 5'-GTGCAGCCCCGGACATCTAAGG-3'              |                 |
| MDM2-FL F              | 5'-GCAGTGAATCTACAGGGACGC-3'               |                 |
| MDM2-FL R              | 5'-ATCCTGATCCAACCAATCACC-3'               |                 |
| MDM2-C F               | 5'-GAAAGAGGATCTTGATGCTGGTGTA-3'           |                 |
| MDM2-C R               | 5'-GGGGGATTCATTTTCATTGCATG-3'             |                 |
| CD44-FL F              | 5'-AGCAACCAAGAGGCAAGAAA-3'                |                 |
| CD44-FL R              | 5'-GTGTGGTTGAAATGGTGCTG-3'                |                 |
| CD44-S F               | 5'-TCCAACACCTCCCAGTATGACA-3'              |                 |
| CD44-S R               | 5'-CCCACATGCCATCTGTTGCC-3'                |                 |
| CD44-V6 F              | 5'-GGAACAGTGGTTTGGCAACAG-3'               |                 |
| CD44-V6 R              | 5'-TTGGGTGTTTGGCGATATCC-3'                |                 |
| VEGFA <sub>8a</sub> F  | 5'-CACCGCCTCGGCTTGTCACAT-3'               |                 |
| VEGFA <sub>8a</sub> R  | 5'-GAGATGAGCTTCCTACAGCAC-3'               |                 |
| VEGFA <sub>8b7</sub> F | 5'-GAGATGAGCTTCCTACAGCAC-3'               |                 |
| VEGFA <sub>8b7</sub> R | 5'-TTAAGCTTTCAGTCTTTCCTGGTGAGAGATCTGCA-3' |                 |

**Table S3 MS analyses of the association of splicing factor(s) with AR-V7 ISE.** 22RV1 and VCaP cell lysates were incubated with RNA oligos containing ISE sequence for pull-down and the associated factors were subjected to LC-MS/MS analysis.

| 22RV1                                                                                       |          | VCaP |              | SPECTRAL COUNTS |        |       |        |        |       |       |       | SPECTRAL INDEX (MIC SIn) |       |       |       |       |  |
|---------------------------------------------------------------------------------------------|----------|------|--------------|-----------------|--------|-------|--------|--------|-------|-------|-------|--------------------------|-------|-------|-------|-------|--|
| TST/DMSO                                                                                    | TST/DMSO | PSMs | peptide Seqs | Coverage        | 22RV1  |       |        |        | VCaP  |       |       |                          | 22RV1 |       | VCaP  |       |  |
|                                                                                             |          |      |              |                 | DMSO   | TST-D | DMSO   | TST-D  | DMSO  | TST-D | DMSO  | TST-D                    | DMSO  | TST-D | DMSO  | TST-D |  |
| HNRPU_HUMAN Heterogeneous nuclear ribonucleoprotein U OS=Homo sapiens GN=HNRNPU PE=1 SV=6   |          |      |              |                 |        |       |        |        |       |       |       |                          |       |       |       |       |  |
| 0.75                                                                                        | 1.44     | 443  | 56           | 53.6            | 67.5   | 54.5  | 58.5   | 64     | 1E-05 | 1E-05 | 1E-05 | 1E-05                    | 1E-05 | 1E-05 | 1E-05 | 2E-05 |  |
| HNRPR_HUMAN Heterogeneous nuclear ribonucleoprotein R OS=Homo sapiens GN=HNRNPR PE=1 SV=1   |          |      |              |                 |        |       |        |        |       |       |       |                          |       |       |       |       |  |
| 0.72                                                                                        | 1.20     | 396  | 38           | 53.7            | 114.09 | 97.36 | 76.73  | 103.24 | 4E-05 | 3E-05 | 2E-05 | 3E-05                    | 2E-05 | 3E-05 | 2E-05 | 3E-05 |  |
| SF3B3_HUMAN Splicing factor 3B subunit 3 OS=Homo sapiens GN=SF3B3 PE=1 SV=4                 |          |      |              |                 |        |       |        |        |       |       |       |                          |       |       |       |       |  |
| 0.46                                                                                        | 0.44     | 349  | 49           | 43              | 110.86 | 75.89 | 100.88 | 60.92  | 8E-06 | 4E-06 | 8E-06 | 4E-06                    | 8E-06 | 4E-06 | 8E-06 | 4E-06 |  |
| SF3B1_HUMAN Splicing factor 3B subunit 1 OS=Homo sapiens GN=SF3B1 PE=1 SV=3                 |          |      |              |                 |        |       |        |        |       |       |       |                          |       |       |       |       |  |
| 0.38                                                                                        | 0.29     | 309  | 58           | 50.7            | 111    | 70    | 92     | 37     | 6E-06 | 2E-06 | 5E-06 | 1E-06                    | 5E-06 | 1E-06 | 5E-06 | 1E-06 |  |
| HNRPO_HUMAN Heterogeneous nuclear ribonucleoprotein Q OS=Homo sapiens GN=SYNCRIP PE=1 SV=2  |          |      |              |                 |        |       |        |        |       |       |       |                          |       |       |       |       |  |
| 1.06                                                                                        | 1.79     | 265  | 39           | 63.9            | 89.13  | 89.13 | 35.64  | 48.51  | 2E-05 | 2E-05 | 4E-06 | 8E-06                    | 2E-05 | 2E-05 | 4E-06 | 8E-06 |  |
| SF3B2_HUMAN Splicing factor 3B subunit 2 OS=Homo sapiens GN=SF3B2 PE=1 SV=2                 |          |      |              |                 |        |       |        |        |       |       |       |                          |       |       |       |       |  |
| 0.35                                                                                        | 0.10     | 213  | 40           | 50.4            | 84.23  | 50.54 | 60.43  | 15.91  | 6E-06 | 2E-06 | 4E-06 | 4E-07                    | 6E-06 | 2E-06 | 4E-06 | 4E-07 |  |
| G8JLB6_HUMAN Heterogeneous nuclear ribonucleoprotein H OS=Homo sapiens GN=HNRNPH1 PE=2 SV=1 |          |      |              |                 |        |       |        |        |       |       |       |                          |       |       |       |       |  |
| 1.18                                                                                        | 1.20     | 159  | 19           | 57              | 39.68  | 44.55 | 31.97  | 37.75  | 7E-06 | 8E-06 | 5E-06 | 6E-06                    | 7E-06 | 8E-06 | 5E-06 | 6E-06 |  |
| HNRPF_HUMAN Heterogeneous nuclear ribonucleoprotein F OS=Homo sapiens GN=HNRNPF PE=1 SV=3   |          |      |              |                 |        |       |        |        |       |       |       |                          |       |       |       |       |  |
| 1.17                                                                                        | 0.98     | 155  | 17           | 57.1            | 36     | 47    | 37     | 35     | 7E-06 | 9E-06 | 7E-06 | 6E-06                    | 7E-06 | 9E-06 | 7E-06 | 6E-06 |  |
| PTBP2_HUMAN Polypyrimidine tract-binding protein 2 OS=Homo sapiens GN=PTBP2 PE=1 SV=1       |          |      |              |                 |        |       |        |        |       |       |       |                          |       |       |       |       |  |
| 0.94                                                                                        | 2.35     | 114  | 19           | 43.9            | 32.67  | 32.67 | 20.79  | 26.73  | 7E-06 | 6E-06 | 2E-06 | 5E-06                    | 7E-06 | 6E-06 | 2E-06 | 5E-06 |  |
| U2AF2_HUMAN Splicing factor U2AF 65 kDa subunit OS=Homo sapiens GN=U2AF2 PE=1 SV=4          |          |      |              |                 |        |       |        |        |       |       |       |                          |       |       |       |       |  |
| 1.06                                                                                        | 0.73     | 101  | 16           | 38.6            | 27     | 27    | 28     | 20     | 4E-06 | 4E-06 | 5E-06 | 4E-06                    | 4E-06 | 4E-06 | 5E-06 | 4E-06 |  |
| SF3A1_HUMAN Splicing factor 3A subunit 1 OS=Homo sapiens GN=SF3A1 PE=1 SV=1                 |          |      |              |                 |        |       |        |        |       |       |       |                          |       |       |       |       |  |
| 0.17                                                                                        | 0.16     | 94   | 26           | 37.1            | 42.86  | 12.95 | 30.89  | 7.99   | 2E-06 | 3E-07 | 1E-06 | 2E-07                    | 2E-06 | 3E-07 | 1E-06 | 2E-07 |  |
| U2AF1_HUMAN Splicing factor U2AF 35 kDa subunit OS=Homo sapiens GN=U2AF1 PE=1 SV=3          |          |      |              |                 |        |       |        |        |       |       |       |                          |       |       |       |       |  |
| 0.53                                                                                        | 0.66     | 66   | 10           | 51.2            | 16.83  | 13.87 | 17.82  | 16.84  | 4E-06 | 2E-06 | 5E-06 | 3E-06                    | 4E-06 | 2E-06 | 5E-06 | 3E-06 |  |
| SF3A3_HUMAN Splicing factor 3A subunit 3 OS=Homo sapiens GN=SF3A3 PE=1 SV=1                 |          |      |              |                 |        |       |        |        |       |       |       |                          |       |       |       |       |  |
| 0.10                                                                                        | 0.21     | 59   | 16           | 32.1            | 20     | 7     | 24     | 9      | 1E-06 | 1E-07 | 2E-06 | 4E-07                    | 1E-06 | 1E-07 | 2E-06 | 4E-07 |  |
| *only PSMs >50 is counted                                                                   |          |      |              |                 |        |       |        |        |       |       |       |                          |       |       |       |       |  |
|                                                                                             | <0.8     |      |              |                 |        |       |        |        |       |       |       |                          |       |       |       |       |  |
|                                                                                             | 0.8-1.2  |      |              |                 |        |       |        |        |       |       |       |                          |       |       |       |       |  |
|                                                                                             | >1.2     |      |              |                 |        |       |        |        |       |       |       |                          |       |       |       |       |  |

## Supplemental Figure Legends

**Figure S1.** (A) Chemical structure of TST-A and TST-D. (B) The effect of TST-A or TST-D on the growth of 22RV1 stimulated by DHT. (C) LAPC-4 and C4-2 were treated with TST-A or TST-D at different concentrations and relative cell number was determined by crystal violet assay 24 hours after treatment.

**Figure S2.** (A) Cells were treated with TST-A at 0, 0.5, 2, 5 nM or TST-D at 0, 5, 20, 50 nM for 4 hours. (B) Cells were treated with 5 nM TST-A or 50 nM TST-D at the indicated time. Total cellular RNA was prepared and subjected to qRT-PCR analyses. After normalizing with 18S rRNA, the relative levels of AR-FL mRNA from each sample were calculated using control (=1). (C) Cells were treated with 5 nM TST-A or 50 nM TST-D at the indicated time. Total cellular RNA was prepared and subjected to qRT-PCR analyses. After normalizing with 18S rRNA, the relative levels of AKR1C3 mRNA from each sample were calculated using control (=1).

**Figure S3.** (A) Immunostaining of AR-V7 protein in 22RV1 cells treated with TST-D. (B) Immunostaining of AR-V7 protein in 22RV1 cells treated with TST-D.

**Figure S4.** The effect of 20 nM TST-D on the expression of different gene splicing variants in AR-V7-expressing cells. The relative levels of mRNA expression from each gene were calculated using control (=1).

**Figure S5.** 22RV1 were transfected with GFP-vec or GFP-AR-FL cDNA for 24 hours; cells were treated with different concentrations of TST-D. Endogenous or exogenous AR-FL protein expression was determined by western blot from cells 4 hours after treatment (lower panel). Cell growth was determined 24 hours after treatment (upper panel). \*  $P < 0.05$ , \*\*  $P < 0.01$ .

**Figure S6.** 22RV1, VCaP and HEK293 cells were transiently transfected with mock vector or ARV7 minigene plasmid. Twenty-four hours after transfection, cells were treated with TST-A at 0, 0.5, 2, 5 nM or TST-D at 0, 5, 20, 50 nM for 4 hours. After normalizing with 18S rRNA, relative levels of AR-FL mRNA from each sample were calculated using control (=1).

**Figure S7.** 22RV1 was pre-treated with 50 nM TST-D for 4 hours, total cell lysate were immunoprecipitated with U2AF35 antibodies plus protein G beads. Bound proteins were eluted and analyzed by western blot

**Figure S8.** (A) Mice bearing 22RV1 xenografts were treated with DMSO or 300  $\mu\text{g}/\text{kg}/\text{day}$  TST-D and tumor volumes were measured every other day. Tumors were excised and photographed at Day 4. (B) 22RV1 xenografts were treated with DMSO or different dosages ranging from 50  $\mu\text{g}/\text{kg}/\text{day}$  to 30  $\text{mg}/\text{kg}/\text{day}$ , western blot was used to determine the expression of AR-V7 and AR-FL. \*  $P < 0.05$  \*\*  $P < 0.01$ .

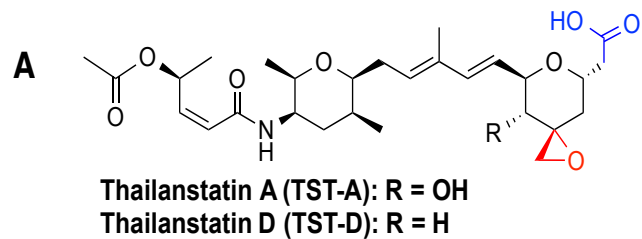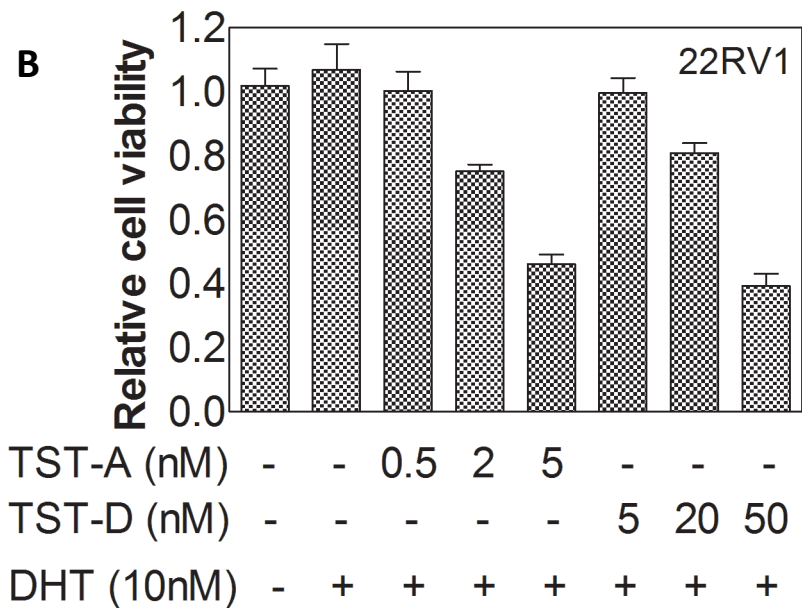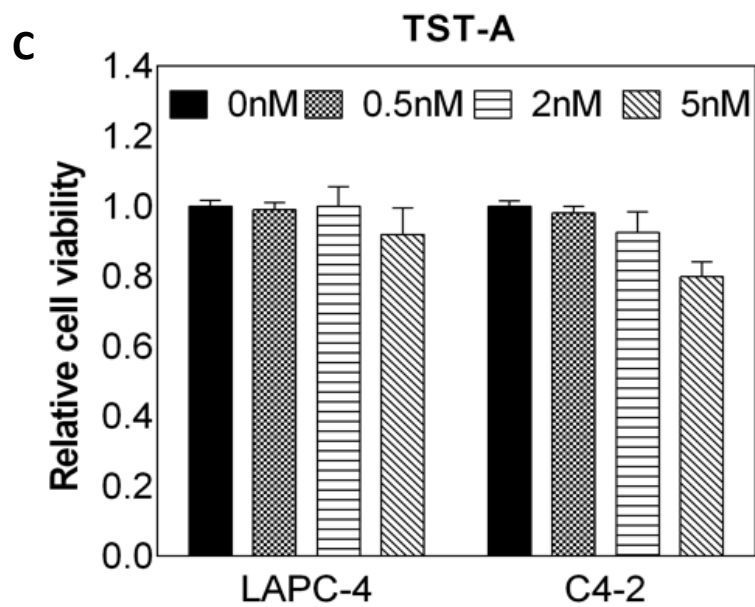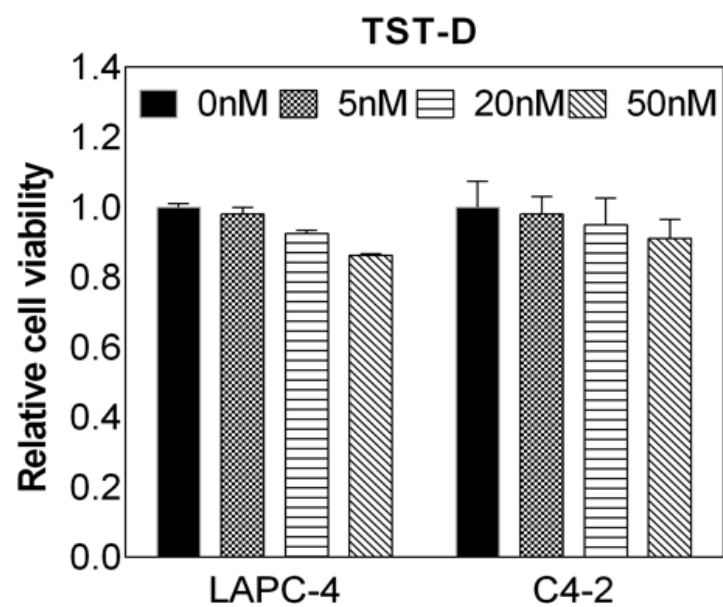

Figure S1

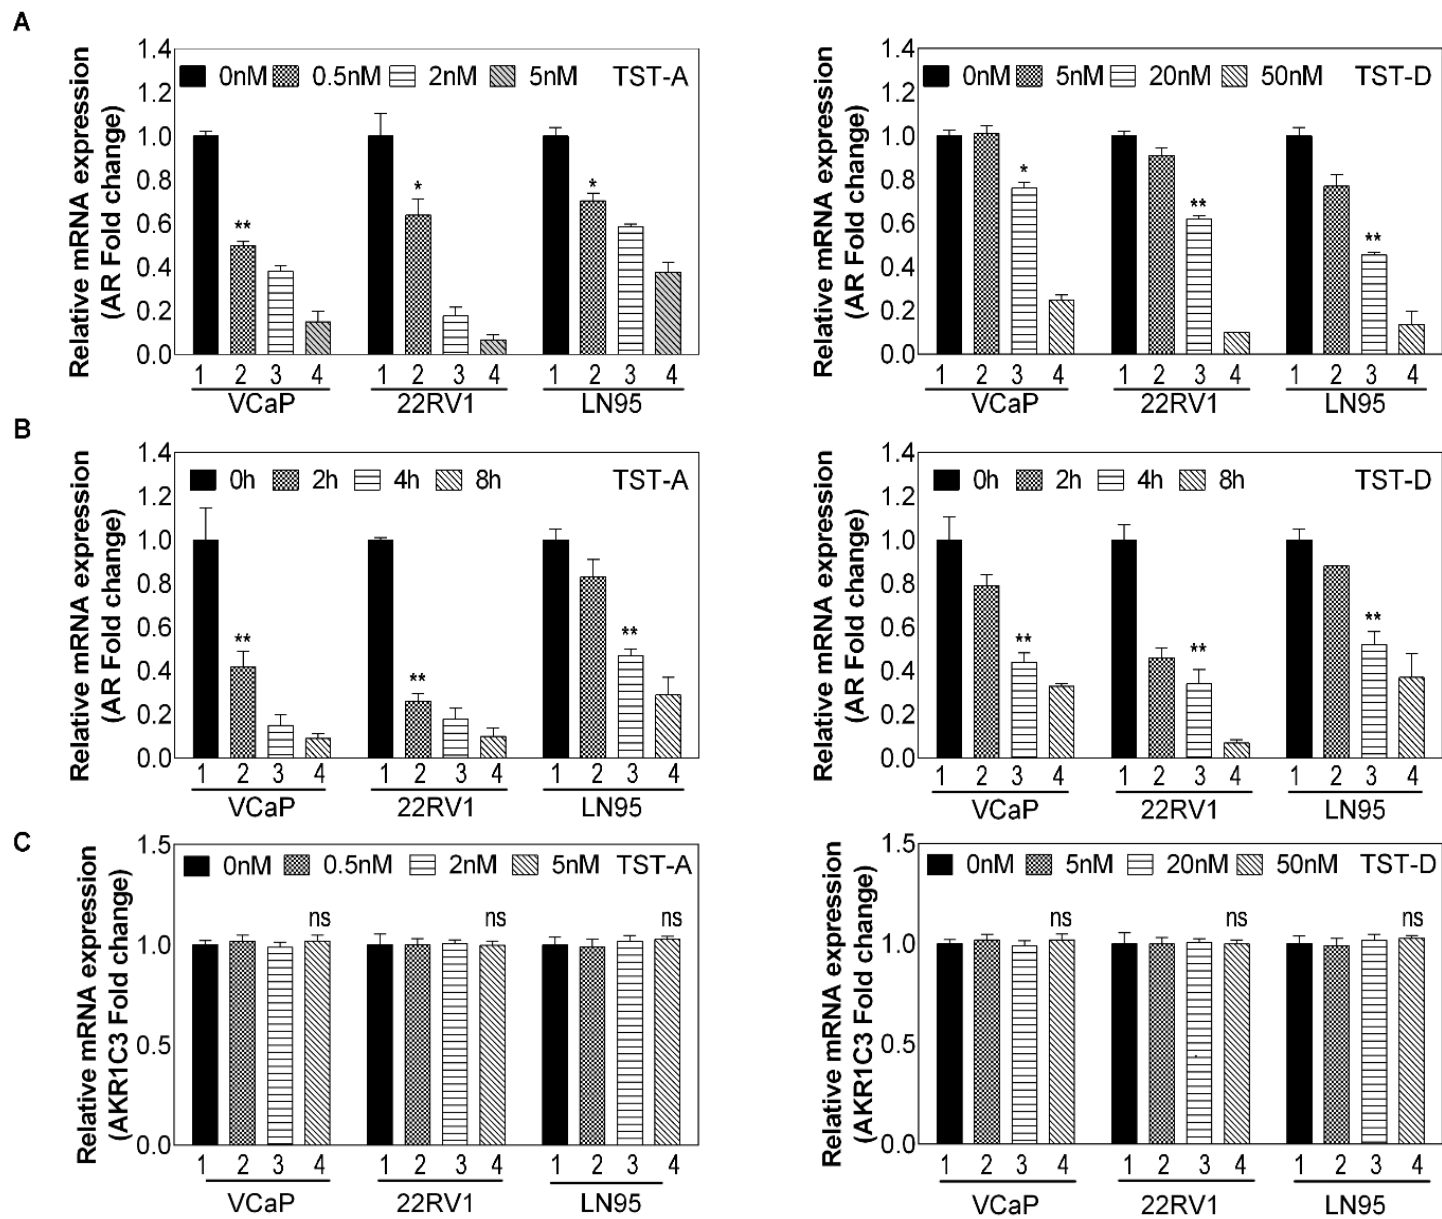

Figure S2



**DMSO**

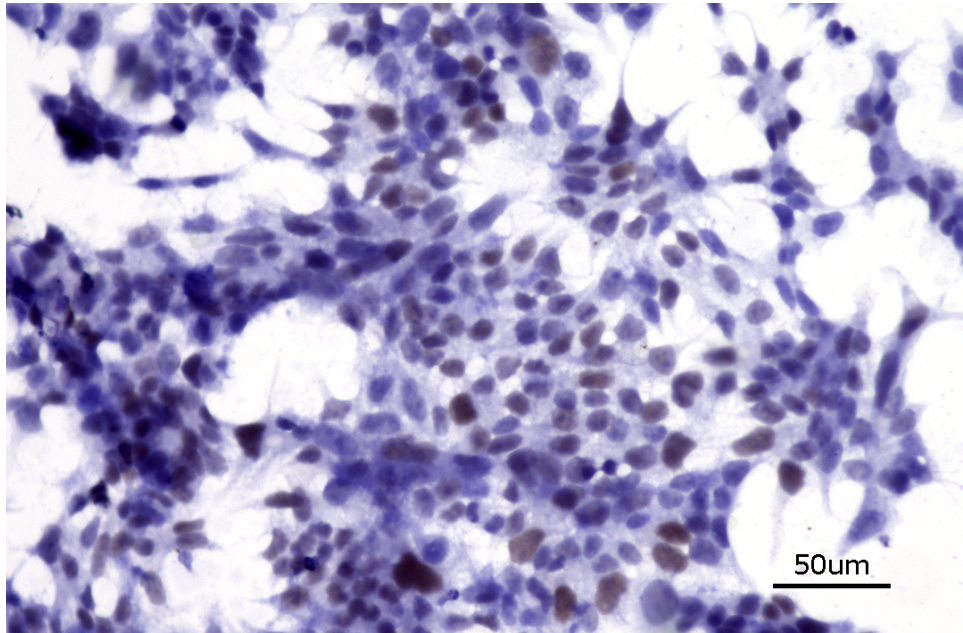

**TST-D**

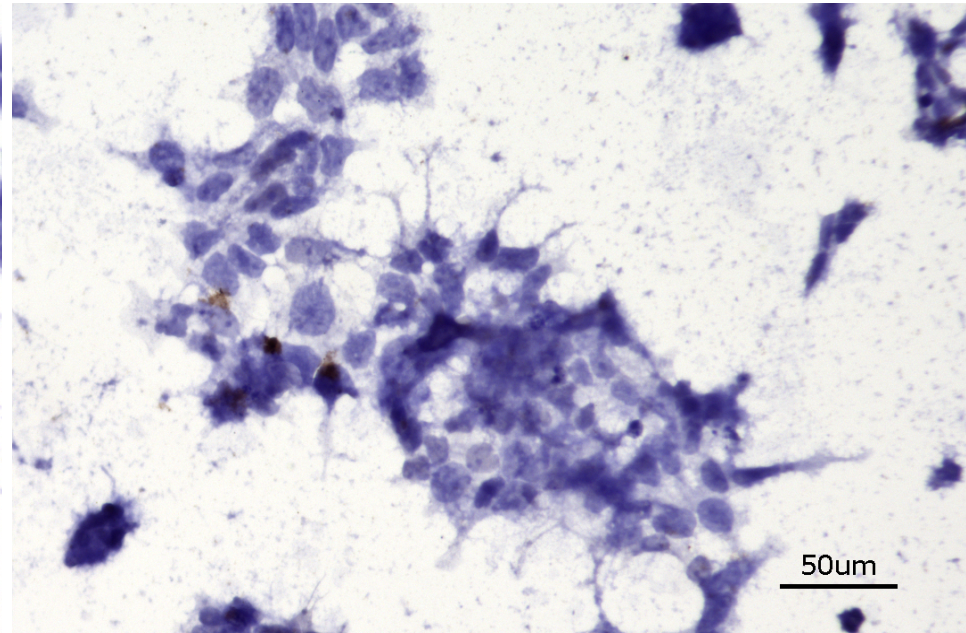

Figure S3

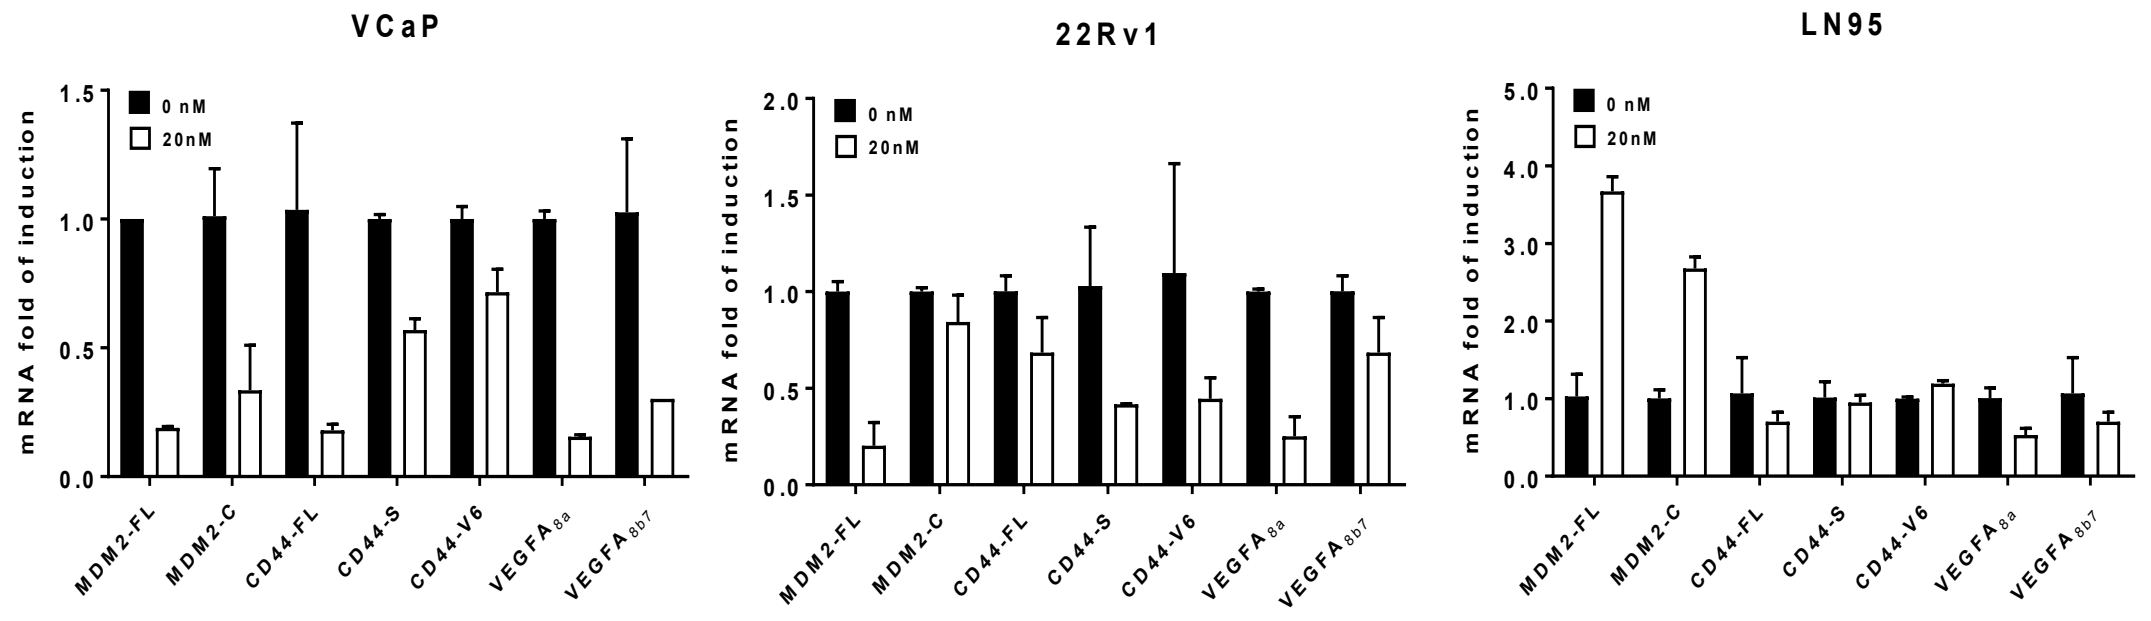

Figure S4

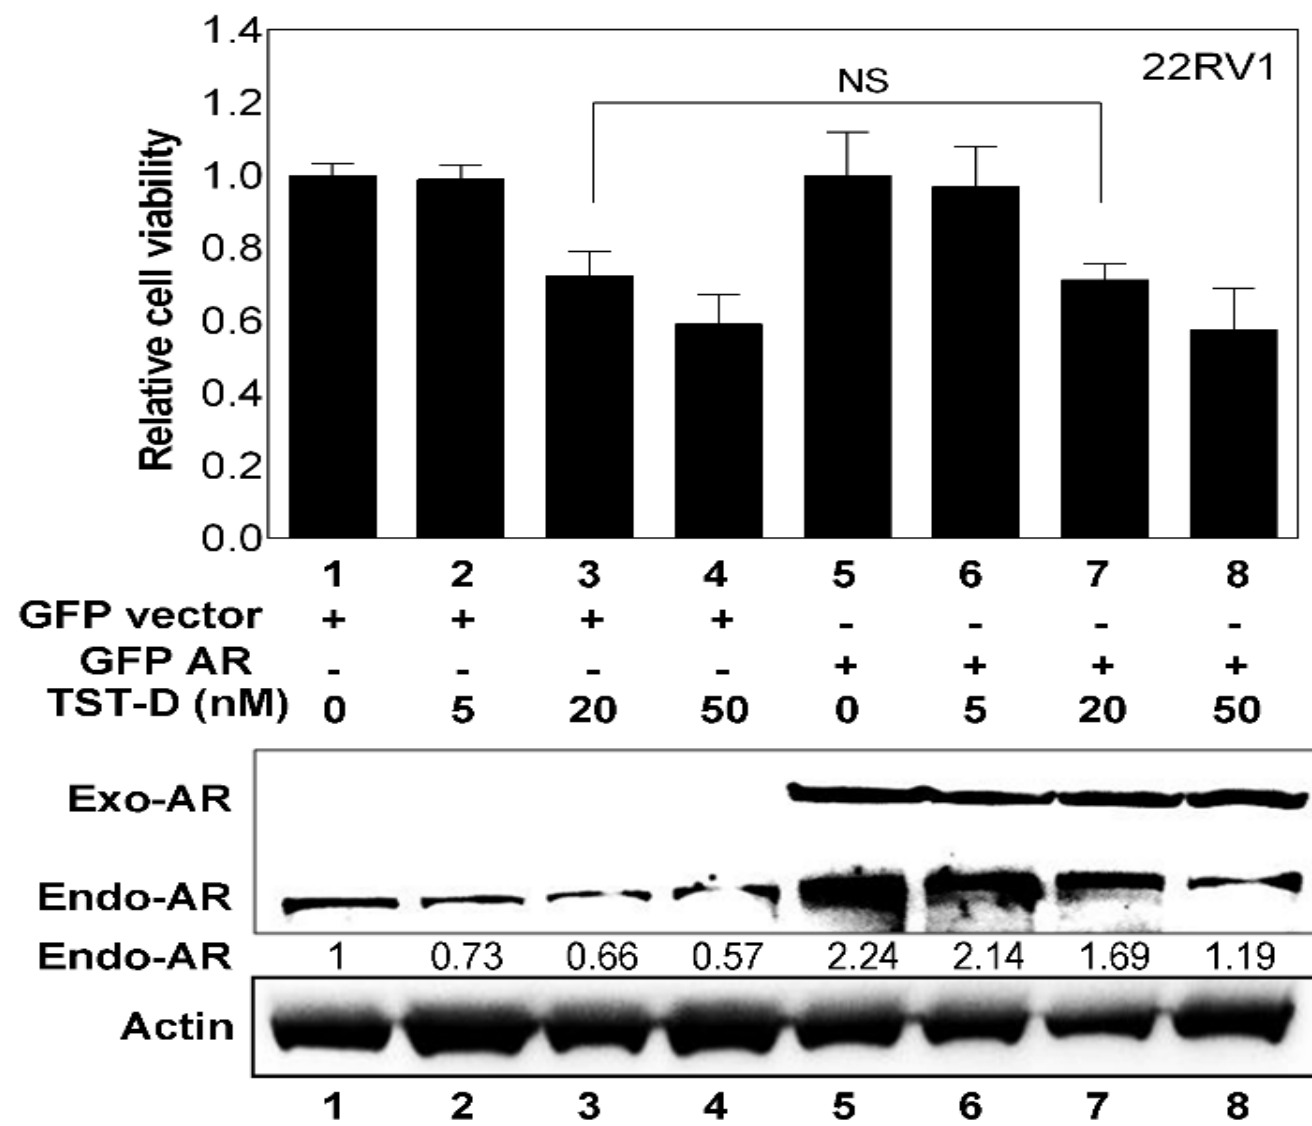

Figure S5

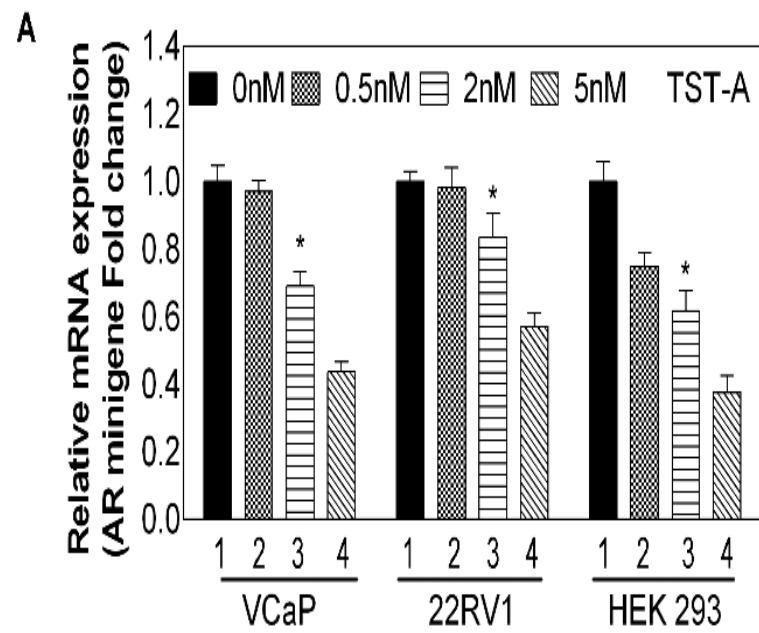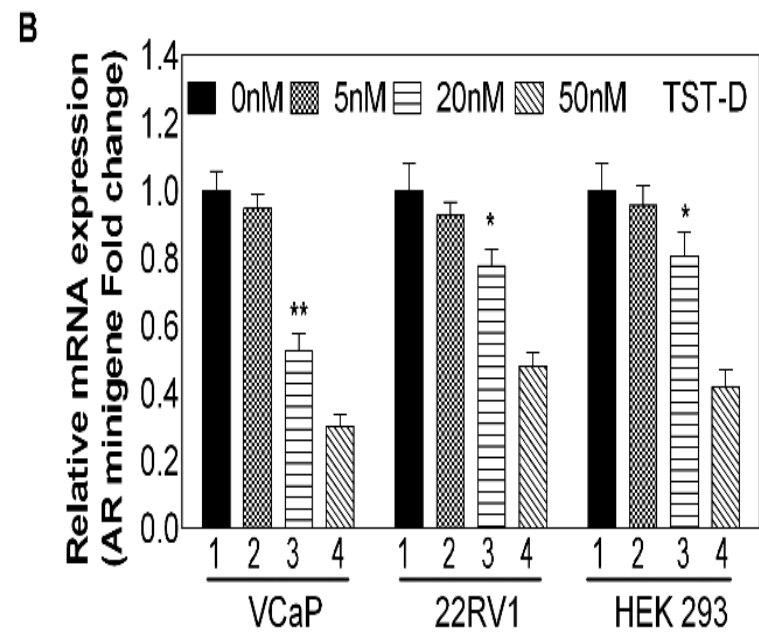

Figure S6

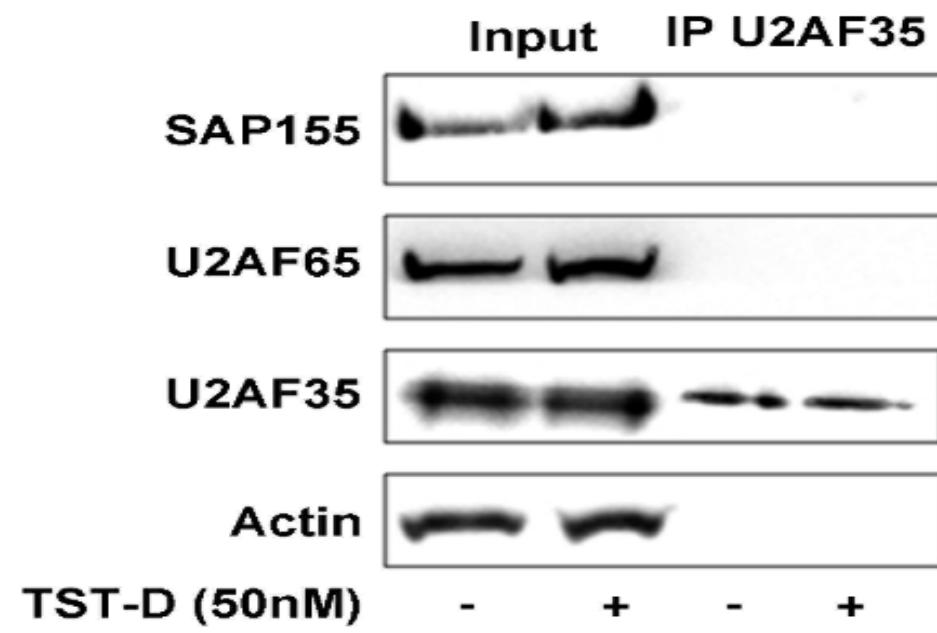

Figure S7

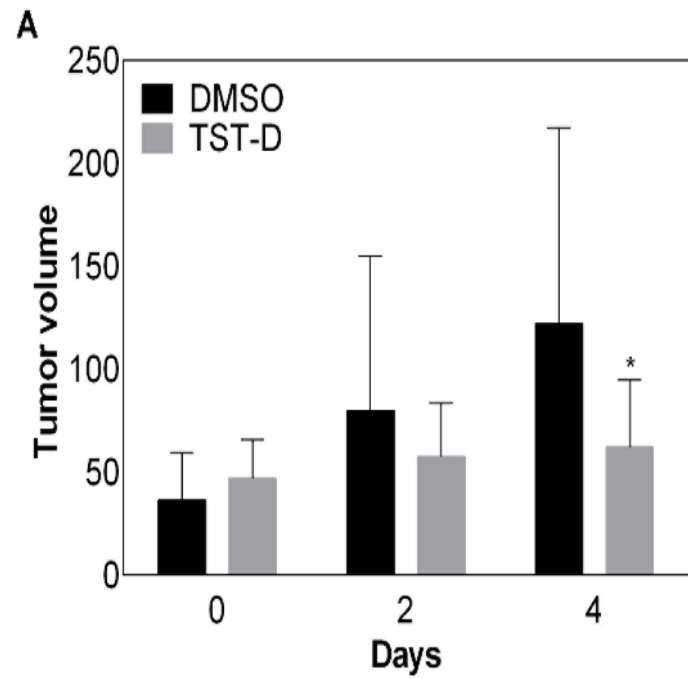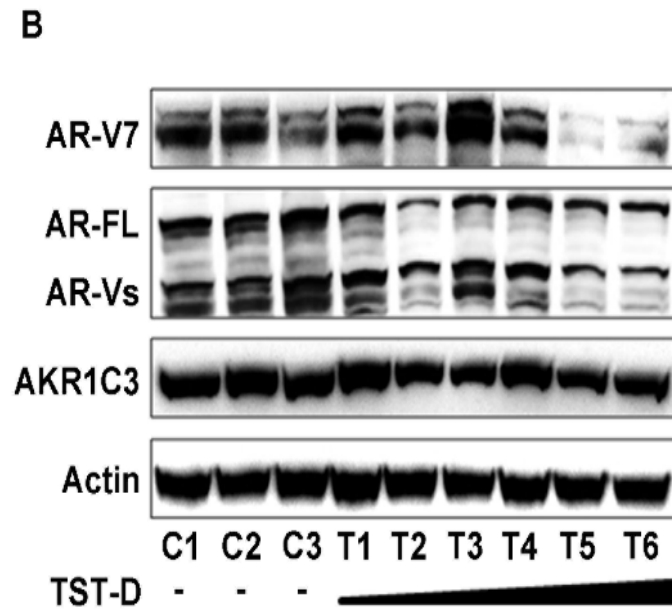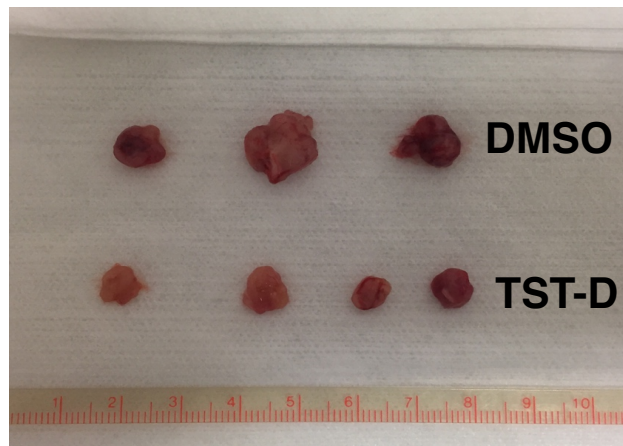

Figure S8
